# Supplementary material for: DC8 and DC13 var Genes Associated with Severe Malaria Bind Avidly to Diverse Endothelial Cells
Source: PubMed Central journal article supplement (PMC3694856; doi:10.1371/journal.ppat.1003430), 2013-06-27
Supplement: ppat.1003430.s003.pdf [file ppat.1003430.s003.pdf]

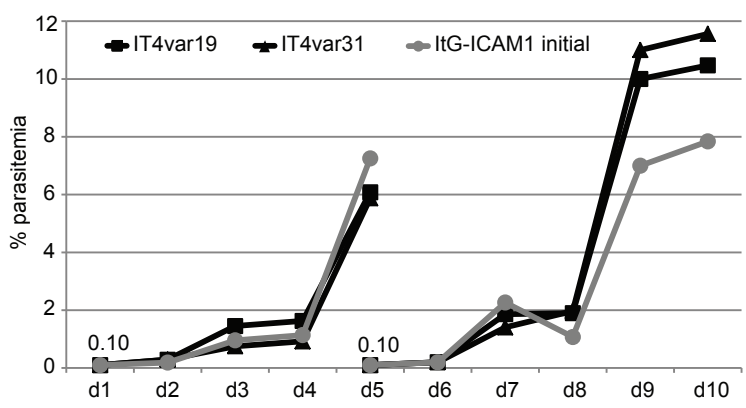

Figure S3. Growth curve of clonal *P. falciparum* parasite lines.
