# Supplementary material for: DC8 and DC13 var Genes Associated with Severe Malaria Bind Avidly to Diverse Endothelial Cells
Source: PubMed Central journal article supplement (PMC3694856; doi:10.1371/journal.ppat.1003430), 2013-06-27
Supplement: ppat.1003430.s004.pdf [file ppat.1003430.s004.pdf]

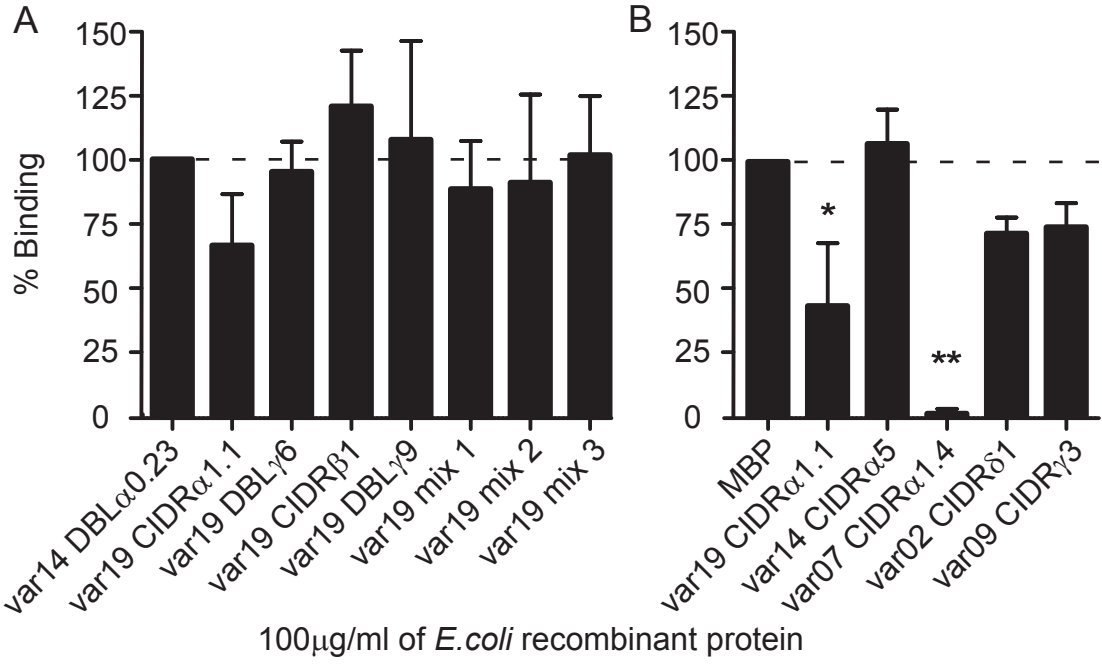

**Figure S4. DC8 and DC13 CIDR1 domains inhibit DC8-IE binding to THBMEC.**
