# Supplementary material for: DC8 and DC13 var Genes Associated with Severe Malaria Bind Avidly to Diverse Endothelial Cells
Source: PubMed Central journal article supplement (PMC3694856; doi:10.1371/journal.ppat.1003430), 2013-06-27
Supplement: ppat.1003430.s005.pdf [file ppat.1003430.s005.pdf]

Table S1: Surface expression of receptors on different endothelial cells

| Tissue                 | Endothelial cell marker             | Endothelial adhesion molecule |            |             |              |          |          |
|------------------------|-------------------------------------|-------------------------------|------------|-------------|--------------|----------|----------|
|                        | CD31                                | ICAM1                         | VCAM       | CD36        | ICAM2        | ELAM     | CXCL1    |
| THBMEC (brain)         | 7062 <sup>a</sup> (33) <sup>b</sup> | 492352 (98)                   | 23668 (61) | 7556 (4)    | 7410 (3)     | 1754 (1) | 8204 (4) |
| HPMEC (pulmonary)      | 303072 (96)                         | 93457 (91)                    | 1825 (5)   | 115269 (33) | 2704748 (97) | 3777 (3) | 0        |
| HCMEC (cardiac)        | 266658 (98)                         | 122608 (97)                   | 1590 (3)   | 1749 (3)    | 1852800 (96) | 1332 (3) | 0        |
| CDD-HMEC (bone marrow) | 527136 (96)                         | 10175 (25)                    | 1374 (3)   | 6000 (5)    | 165292 (86)  | 3165 (5) | 3900 (5) |

<sup>a</sup> Relative surface expression level (=MFI of positive reactive cells x % positive reactive cells)

<sup>b</sup> % positive reactive cells
